# Supplementary material
Source: publisher figshare collection journal article supplement (https://springernature.figshare.com/ndownloader/files/37384683)
Supplement: Supplementary file [file 37384683]

| <b>Study</b>        | <b>Title</b>                                                                                                                                                         |
|---------------------|----------------------------------------------------------------------------------------------------------------------------------------------------------------------|
| Abd El Salam 2011   | Low-dye taping versus medial arch support in managing pain and pain-related disability in patients with plantar fasciitis                                            |
| Abt 2002            | Shock wave therapy for recalcitrant plantar fasciitis with heel spur: prospective randomized placebo-controlled double-blind study                                   |
| Acosta-Olivo 2017   | Plantar Fasciitis-A Comparison of Treatment with Intralesional Steroids versus Platelet-Rich Plasma A Randomized, Blinded Study                                      |
| Ahmad 2017          | Treatment of Plantar Fasciitis With Botulinum Toxin: A Randomized, Controlled Study                                                                                  |
| Ahmadzadeh 2019     | Effect of dose of the corticosteroid injected locally on inflammatory diseases                                                                                       |
| Ajimsha 2014        | Effectiveness of myofascial release in the management of plantar heel pain: a randomized controlled trial                                                            |
| Akinoglu 2017       | Comparison of the Acute Effect of Radial Shock Wave Therapy and Ultrasound Therapy in the Treatment of Plantar Fasciitis: A Randomized Controlled Study              |
| Al-Bluwi 2011       | Efficacy of EZStep in the management of plantar fasciitis: a prospective, randomized study                                                                           |
| Alotaibi 2015       | Effect of Monophasic Pulsed Current on Heel Pain and Functional Activities caused by Plantar Fasciitis                                                               |
| Babaei-Ghazani 2019 | Comparison of Ultrasound-Guided Local Ozone (O2-O3) Injection vs Corticosteroid Injection in the Treatment of Chronic Plantar Fasciitis: A Randomized Clinical Trial |
| Baldassin 2009      | Effectiveness of Prefabricated and Customized Foot Orthoses Made From Low-Cost Foam for Noncomplicated Plantar Fasciitis: A Randomized Controlled Trial              |
| Ball 2013           | Steroid injection for inferior heel pain: a randomised controlled trial                                                                                              |
| Basford 1998        | A randomized controlled evaluation of low-intensity laser therapy: Plantar fasciitis                                                                                 |
| Bonanno 2011        | Pressure-relieving properties of various shoe inserts in older people with plantar heel pain                                                                         |
| Canyilmaz 2015      | Prospective Randomized Comparison of the Effectiveness of Radiation Therapy and Local Steroid Injection for the Treatment of Plantar Fasciitis                       |
| Catal 2017          | Endoscopic Plantar Fasciotomy; Deep Fascial Versus Superficial Fascial Approach: A Prospective Randomized Study                                                      |
| Chan 2015           | The effects of the application of low-dye taping on paretic side plantar pressure among patients with plantar fasciitis                                              |
| Chetri 2016         | A Comparative Study on Effectiveness of Taping with Iontophoresis and Taping Alone in Chronic Plantar Fasciitis                                                      |
| Chow 2007           | Comparison of different energy densities of extracorporeal shock wave therapy (ESWT) for the management of chronic heel pain                                         |
| Cinar 2017          | Low-level laser therapy in the management of plantar fasciitis: a randomized controlled trial                                                                        |
| Cinar 2018          | Combination Therapy Versus Exercise and Orthotic Support in the Management of Pain in Plantar Fasciitis: A Randomized Controlled Trial                               |
| Cleland 2009        | Manual Physical Therapy and Exercise Versus Electrophysical Agents and Exercise in the Management of Plantar Heel Pain: A Multicenter Randomized Clinical Trial      |
| Costantino 2014     | Cryoultrasound therapy in the treatment of chronic plantar fasciitis with heel spurs. A randomized controlled clinical study                                         |
| Crawford 1999       | Steroid injection for heel pain: evidence of short-term effectiveness. A randomized controlled trial                                                                 |
| Das 2015            | The Effects of Interferential Therapy for Industrial Workers in Case of Plantar Fasciitis                                                                            |
| DiGiovanni 2006     | Plantar fascia-specific stretching exercise improves outcomes in patients with chronic plantar fasciitis. A prospective clinical trial with two-year follow-up       |
| Dogramaci 2010      | Intracorporeal pneumatic shock application for the treatment of chronic plantar fasciitis: a randomized, double blind prospective clinical trial                     |
| Eftekharsadat 2016  | Dry needling in patients with chronic heel pain due to plantar fasciitis: A single-blinded randomized clinical trial                                                 |

|                          |                                                                                                                                                                                                       |
|--------------------------|-------------------------------------------------------------------------------------------------------------------------------------------------------------------------------------------------------|
| Ermutlu 2018             | Thickness of plantar fascia is not predictive of functional outcome in plantar fasciitis treatment                                                                                                    |
| Ersen 2018               | A randomized-controlled trial of prolotherapy injections in the treatment of plantar fasciitis                                                                                                        |
| Fernandez-Rodriguez 2018 | Prospective Randomized Trial of Electrolysis for Chronic Plantar Heel Pain                                                                                                                            |
| Fouda 2016               | Effect of Low Energy Versus Medium Energy Radial Shock Wave Therapy in the Treatment of Chronic Planter Fasciitis                                                                                     |
| Ge 2017                  | Dry cupping for plantar fasciitis: a randomized controlled trial                                                                                                                                      |
| Geddesmeyer 2008         | Radial extracorporeal shock wave therapy is safe and effective in the treatment of chronic recalcitrant plantar fasciitis: Results of a confirmatory randomized placebo-controlled multicenter study  |
| Gollwitzer 2007          | Extracorporeal shock wave therapy for chronic painful heel syndrome: a prospective, double blind, randomized trial assessing the efficacy of a new electromagnetic shock wave device                  |
| Grecco 2013              | One-year treatment follow-up of plantar fasciitis: radial shockwaves vs. conventional physiotherapy                                                                                                   |
| Guner 2013               | Effectiveness of Local Tenoxicam Versus Corticosteroid Injection for Plantar Fasciitis Treatment                                                                                                      |
| Gurcay 2017              | Shall We Inject Superficial or Deep to the Plantar Fascia? An Ultrasound Study of the Treatment of Chronic Plantar Fasciitis                                                                          |
| Haake 2003               | Extracorporeal shock wave therapy for plantar fasciitis: randomised controlled multicentre trial [with consumer summary]                                                                              |
| Hammer 2003              | Extracorporeal shock wave therapy (ESWT) in patients with chronic proximal plantar fasciitis: A 2-year follow-u                                                                                       |
| Harlapur 2010            | Comparison of myofascial release and positional release therapy in plantar fasciitis -- a clinical trial                                                                                              |
| Hawamdeh 2016            | The short-term effect of extracorporeal shock wave in treating plantar fasciitis: RCT                                                                                                                 |
| Hsi 1999                 | In-shoe pressure measurements with a viscoelastic heel orthosis                                                                                                                                       |
| Ibrahim 2010             | Chronic Plantar Fasciitis Treated with Two Sessions of Radial Extracorporeal Shock Wave Therapy                                                                                                       |
| Karimzadeh 2017          | Autologous whole blood versus corticosteroid local injection in treatment of plantar fasciitis: A randomized, controlled multicenter clinical trial                                                   |
| Katzap 2018              | Additive Effect of Therapeutic Ultrasound in the Treatment of Plantar Fasciitis: a Randomized Controlled Trial                                                                                        |
| Kim 2015                 | Effectiveness of polydeoxyribonucleotide injection versus normal saline injection for treatment of chronic plantar fasciitis: a prospective randomised clinical trial                                 |
| Kudo 2006                | Randomized, placebo-controlled, double-blind clinical trial evaluating the treatment of plantar fasciitis with an extracorporeal shockwave therapy (ESWT) device: A North American confirmatory study |
| Kumar 2017               | Efficacy of Myofascial Release Technique in Chronic Plantar Fasciitis: A Randomized Controlled Trial                                                                                                  |
| Kumnerddee 2012          | Efficacy of Electro-Acupuncture in Chronic Plantar Fasciitis: A Randomized Controlled Trial                                                                                                           |
| Labek 2005               | Influence of local anesthesia and energy level on the clinical outcome of extracorporeal shock wave-treatment of chronic plantar fasciitis - A prospective randomized clinical trial                  |
| Lai 2018                 | Ultrasonography and clinical outcome comparison of extracorporeal shock wave therapy and corticosteroid injections for chronic plantar fasciitis: A randomized controlled trial                       |
| Landorf 2006             | Effectiveness of foot orthoses to treat plantar fasciitis: a randomized trial                                                                                                                         |
| Lee 2007                 | Intralesional autologous blood injection compared to corticosteroid injection for treatment of chronic plantar fasciitis. A prospective, randomized, controlled trial                                 |
| Lohrer 2010              | Comparison of Radial Versus Focused Extracorporeal Shock Waves in Plantar Fasciitis Using Functional Measures                                                                                         |
| Lynch 1998               | Conservative treatment of plantar fasciitis a prospective study                                                                                                                                       |
| Macias 2015              | Low-Level Laser Therapy at 635 nm for Treatment of Chronic Plantar Fasciitis: A Placebo-Controlled, Randomized Study                                                                                  |

|                  |                                                                                                                                                                                                                          |
|------------------|--------------------------------------------------------------------------------------------------------------------------------------------------------------------------------------------------------------------------|
| Marks 2013       | Low-energy extracorporeal shock-wave therapy in treatment of painful heel: double blind randomized controlled, prospectivetrial with follow-up after 24 months                                                           |
| Molund 2018      | Proximal Medial Gastrocnemius Recession and Stretching Versus Stretching as Treatment of Chronic Plantar Heel Pain                                                                                                       |
| Monto 2014       | Platelet-Rich Plasma Efficacy Versus Corticosteroid Injection Treatment for Chronic Severe Plantar Fasciitis                                                                                                             |
| Niewald 2012     | Randomized, Multicenter Trial on the Effect of Radiation Therapy on Plantar Fasciitis (Painful Heel Spur) Comparing a Standard Dose With a Very Low Dose: Mature Results After 12 Months' Follow-Up                      |
| Niewald 2015     | Randomized multicenter follow-up trial on the effect of radiotherapy on painful heel spur (plantar fasciitis) comparing two fractionation schedules with uniform total dose: first results after three months' follow-up |
| Ogden 2004       | Electrohydraulic high-energy shock-wave treatment for chronic plantar fasciitis                                                                                                                                          |
| Oliveira 2015    | Effectiveness of total contact insoles in patients with plantar fasciitis                                                                                                                                                |
| Ordahan 2018     | The effect of high-intensity versus low-level laser therapy in the management of plantar fasciitis: a randomized clinical trial                                                                                          |
| Othman 2015      | Endoscopic plantar fasciotomy versus injection of platelet-rich plasma for resistant plantar fasciopathy                                                                                                                 |
| Ott 2013         | Radiotherapy for calcaneodynia Results of a single center prospective randomized dose optimization trial                                                                                                                 |
| Peterlein 2012   | Is Botulinum Toxin A Effective for the Treatment of Plantar Fasciitis?                                                                                                                                                   |
| Porter 2005      | Intralesional corticosteroid injection versus extracorporeal shock wave therapy for plantar fasciopathy                                                                                                                  |
| Powell 1998      | Effective treatment of chronic plantar fasciitis with dorsiflexion night splints: A crossover prospective randomized outcome study                                                                                       |
| Radford 2006     | Effectiveness of low-Dye taping for the short-term treatment of plantar heel pain: a randomised trial                                                                                                                    |
| Radwan 2012      | Resistant plantar fasciopathy: shock wave versus endoscopic plantar fascial release                                                                                                                                      |
| Rahbar 2018      | A Comparison of the Efficacy of Dry-Needling and Extracorporeal Shockwave Therapy for Plantar Fasciitis: A Randomized Clinical Trial                                                                                     |
| Ratna 2015       | Effect of Kinesio Taping in Adjunct to Conventional Therapy in Reducing Pain and Improving Functional Ability in Individuals with Plantar Fasciitis - a Randomized Controlled Trial                                      |
| RenanOrdine 2010 | The effects of calf muscle trigger-points disactivation in plantar fasciitis                                                                                                                                             |
| Riel 2018        | The effect of isometric exercise on pain in individuals with plantar fasciopathy: a randomised crossover trial [with consumer summary]                                                                                   |
| Roca 2016        | Comparison of extracorporeal shock wave therapy with botulinum toxin type A in the treatment of plantar fasciitis                                                                                                        |
| Rome 2004        | Evaluating the clinical effectiveness and cost-effectiveness of foot orthoses in the treatment of plantar heel pain - A feasibility study                                                                                |
| Rompe 2002       | Evaluation of low-energy extracorporeal shock-wave application for treatment of chronic plantar fasciitis                                                                                                                |
| Ryan 2014        | Comparison of a Physiotherapy Program Versus Dexamethasone Injections for Plantar Fasciopathy in Prolonged Standing Workers: A Randomized Clinical Trial                                                                 |
| Saba 2016        | Ultrasound-guided versus palpation-guided local corticosteroid injection therapy for treatment of plantar fasciitis                                                                                                      |
| Safeer 2017      | Comparison Study on treatment of Plantar Fasciitis of Foot with Local Steroids Injections and Syptomatic Treatment with Analgesics                                                                                       |
| Shah 2014        | A Study on effect of Myofascial Release in Plantar Fascitis                                                                                                                                                              |
| Shah 2018        | Effect of Myofascial Release as an Adjunct Treatment to Conventional Physiotherapy in Plantar Fasciitis                                                                                                                  |
| Shaheen 2010     | Comparison of three different treatment protocols of low-energy radial extracorporeal shock wave therapy for management of chronic plantar fasciitis                                                                     |
| Sharifian 2018   | Comparison of the Effect of Prefabricated Foot Orthoses on Pain and Quality of Life in Women With Plantar Fasciitis                                                                                                      |

Shashua 2015 The Effect of Additional Ankle and Midfoot Mobilizations on Plantar Fasciitis: A Randomized Controlled Trial

Shenoy 2016 Comparison of Effectiveness of Myofascial Release Technique and Cyriax Technique on Pain Response and Flexibility in Patients with Chronic Plantar Fasciitis

Srivastava 2017 Comparison between Effectiveness of Iontophoresis and Conventional Therapy in the Management of Plantar Fasciitis

Takla 2018 Clinical effectiveness of multi-wavelength photobiomodulation therapy as an adjunct to extracorporeal shock wave therapy in the management of plantar fasciitis: a randomized controlled trial

Tiwari 2013 Platelet rich plasma therapy: A comparative effective therapy with promising results in plantar fasciitis

Tornese 2008 Comparison of two extracorporeal shock wave therapy techniques for the treatment of painful subcalcaneal spur. A randomized controlled study

Tsai 2006 Plantar fasciitis treated with local steroid injection: comparison between sonographic and palpation guidance

Uğurlar 2018 Effectiveness of Four Different Treatment Modalities in the Treatment of Chronic Plantar Fasciitis During a 36-Month Follow-Up Period: a Randomized Controlled Trial

Vahdatpour 2016 Autologous platelet-rich plasma compared with whole blood for the treatment of chronic plantar fasciitis; a comparative clinical trial

Vahdatpour 2018 Enhancement of the Effectiveness of Extracorporeal Shock Wave Therapy with Topical Corticosteroid in Treatment of Chronic Plantar Fasciitis: A Randomized Control Clinical Trial

Vahdatpour 2012 Extracorporeal shock wave therapy in patients with plantar fasciitis. A randomized, placebo-controlled trial with ultrasonographic and subjective outcome assessments

Vicenzino 2015 Orthosis-Shaped Sandals Are as Efficacious as In-Shoe Orthoses and Better than Flat Sandals for Plantar Heel Pain: A Randomized Control Trial

Winemiller 2003 Effect of magnetic vs sham-magnetic insoles on plantar heel pain: a randomized controlled trial

Yan 2014 [Therapeutic effect of extracorporeal shock wave combined with orthopaedic insole on plantar fasciitis]

Ye 2015 A comparative efficacy evaluation of ultrasound-guided pulsed radiofrequency treatment in the gastrocnemius in managing plantar heel pain: a randomized and controlled trial

Yucel 2010 Comparison of high-dose extracorporeal shockwave therapy and intralesional corticosteroid injection in the treatment of plantar fasciitis

Yüzer 2006 Comparison of the effectiveness of laser therapy and steroid injection in epin calcanei

Zamani 2014 Comparing the effect of low-power laser therapy with methylprednisolone injection in unilateral plantar fasciitis

Zelen 2013 Prospective, Randomized, Blinded, Comparative Study of Injectable Micronized Dehydrated Amniotic/Chorionic Membrane Allograft for Plantar Fasciitis-A Feasibility Study

Zhang 2009 Acupuncture treatment for plantar fasciitis: a randomized controlled trial with six months follow-up

Kamonseki 2016 Effect of stretching with and without muscle strengthening exercises for the foot and hip in patients with plantar fasciitis: A randomized controlled single-blind clinical trial

İñizdemir 2002 The results of non-invasive conservative treatment of heel pain and the role of subcalcaneal spur in heel pain

AguiarGonçalves 2017 Static, dynamic balance and functional performance in subjects with and without plantar fasciitis

Aloulou 2013 What are the different medical treatment methods for plantar fasciitis?

Alvarez 2002 Preliminary results on the safety and efficacy of the OssaTron (R) for treatment of plantar fasciitis

Aranda 2014 Plantar Fasciitis and Its Relationship with Hallux Limitus

AristótelesGonzález 2005 Utility of the radial shock waves in tendon pathology

Arslan 2016 Treatment of Chronic Plantar Heel Pain With Radiofrequency Neural Ablation of the First Branch of the Lateral Plantar Nerve and Medial Calcaneal Nerve Branches

Badakhshi 2014 Low dose radiotherapy for plantar fasciitis. Treatment outcome of 171 patients

Barnes 2017 Clinical and Functional Characteristics of People With Chronic and Recent-Onset Plantar Heel Pain

Berlet 2002 A prospective trial of night splinting in the treatment of recalcitrant plantar fasciitis: the Ankle Dorsiflexion Dynasplint

Beyzadeoglu 2007 [The effectiveness of dorsiflexion night splint added to conservative treatment for plantar fasciitis]

Blanco 2001 Endoscopic treatment of calcaneal spur syndrome: A comprehensive technique

Braun 2018 Should I Stay or Should I Go? A Prospective, Blinded Study Comparing the Diagnostic Capability of Dynamic and Stationary Pedobarography in Plantar Fasciitis

Chang 2007 Medial calcaneal neuropathy is associated with plantar fasciitis

Chang 2012 Use of MRI for volume estimation of tibialis posterior and plantar intrinsic foot muscles in healthy and chronic plantar fasciitis limbs  
Correlation between computerised findings and Newman's scaling on vascularity using power Doppler ultrasonography imaging and its predictive value in patients with plantar fasciitis

Chen 2012 The "Bodily Pain" Scale of the Short Form-36 Questionnaire is a Predictor of Outcome in Patients who Receive Ultrasound-Guided Corticosteroid Injection for Plantar Fasciitis-A Preliminary Study

Chen 2014

Chia 2009 Comparative Trial of the Foot Pressure Patterns between Corrective Orthotics, Formthotics, Bone Spur Pads and Flat Insoles in Patients with Chronic Plantar Fasciitis

Concerto 2016 Anodal transcranial direct current stimulation for chronic pain in the elderly: a pilot study

Cotchett 2016 Depression, Anxiety, and Stress in People With and Without Plantar Heel Pain

Cotchett 2017 The association between pain catastrophising and kinesiophobia with pain and function in people with plantar heel pain

Doshi 2016 Short-term Effects of Kinesiotaping on Pain and Function in Patients with Plantar Fasciitis

ElShazly 2010 Endoscopic plantar fascia release by hooked soft-tissue electrode after failed shock wave therapy

Erken 2014 Prospective Study of Percutaneous Radiofrequency Nerve Ablation for Chronic Plantar Fasciitis

Fabrikant 2011 Plantar fasciitis (fasciosis) treatment outcome study: plantar fascia thickness measured by ultrasound and correlated with patient self-reported improvement

Filippou 2004 Sport related plantar fasciitis. Current diagnostic and therapeutic advances

Fleischer 2015 Prognostic Value of Diagnostic Sonography in Patients With Plantar Fasciitis

Gamba 2018 Relationship of Plantar Fascia Thickness and Preoperative Pain, Function, and Quality of Life in Recalcitrant Plantar Fasciitis

Ghafoor 2016 Effectiveness of Manual Physical Therapy in Treatment of Plantar Fasciopathy

Ghandour 2015 Evaluation and results of modified deep fascial endoscopic plantar fasciotomy

Granado 2018 Metatarsophalangeal joint extension changes ultrasound measurements for plantar fascia thickness

Gulick 2000 Effects of acetic acid iontophoresis on heel spur reabsorption

Gupta 2016 Autologous platelet-rich plasma injection in tennis elbow and plantar fasciitis

Harty 2005 The role of hamstring tightness in plantar fasciitis

Hassan 2009 Percutaneous fenestration of the anteromedial aspect of the calcaneus for resistant heel pain syndrome

Hsu 2013 Effect of shockwave therapy on plantar fasciopathy. A biomechanical prospective

Hsu 2018 Effect of Extracorporeal Shockwave Therapy on Passive Ankle Stiffness in Patients With Plantar Fasciopathy

|                     |                                                                                                                                                                        |
|---------------------|------------------------------------------------------------------------------------------------------------------------------------------------------------------------|
| leong 2013          | Ultrasound scanning for recalcitrant plantar fasciopathy. Basis of a new classification                                                                                |
| Jakobeit 2002       | Ultrasound guided extracorporeal shock wave therapy of symptomatic plantar calcaneal spur                                                                              |
| Jamali 2004         | Windlass taping technique for symptomatic relief of plantar fasciitis                                                                                                  |
| Kapoor 2010         | Realtime elastography in plantar fasciitis: Comparison with ultrasonography and MRI                                                                                    |
| Karabay 2007        | Ultrasonographic evaluation in plantar fasciitis                                                                                                                       |
| Kayhan 2011         | Sonographically Guided Corticosteroid Injection for Treatment of Plantar Fasciosis                                                                                     |
| Krishnan 2012       | Evaluation of therapeutic effects of extracorporeal shock wave therapy in resistant plantar fasciitis patients in a tertiary care setting                              |
| Kumar 2013          | The treatment of intractable plantar fasciitis with platelet-rich plasma injection                                                                                     |
| Kuwada 2011         | A prospective randomized trial using four treatment modalities for the treatment of plantar fasciitis                                                                  |
| Kuyucu 2015         | The association of calcaneal spur length and clinical and functional parameters in plantar fasciitis                                                                   |
| Li 2013             | [Arthroscopic treatment of painful heel syndrome with radio-frequency]                                                                                                 |
| Li 2018             | 3D printing individualized heel cup for improving the self-reported pain of plantar fasciitis                                                                          |
| Looney 2011         | Graston Instrument Soft Tissue Mobilization and Home Stretching for the Management of Plantar Heel Pain: A Case Series                                                 |
| Lorkowski 2009      | [Underfoot pressure distribution of female patients with obesity and plantar fasciitis]                                                                                |
| Maffulli 2018       | Extracorporeal shock wave therapy in the management of insertional plantar fasciitis: the ASSERT database                                                              |
| Mahowald 2011       | The Correlation Between Plantar Fascia Thickness and Symptoms of Plantar Fasciitis                                                                                     |
| Maier 1999          | Castor oil decreases pain during extracorporeal shock wave application                                                                                                 |
| Maier 2000          | Extracorporeal shock wave application for chronic plantar fasciitis associated with heel spurs: Prediction of outcome by magnetic resonance imaging                    |
| Maki 2015           | Correlation between the outcome of extracorporeal shockwave therapy and pretreatment MRI findings for chronic plantar fasciitis                                        |
| McClinton 2015      | Predictors of Response to Physical Therapy Intervention for Plantar Heel Pain                                                                                          |
| McClinton 2016      | Impaired Foot Plantar Flexor Muscle Performance in Individuals With Plantar Heel Pain and Association With Foot Orthosis Use                                           |
| Mehlhorn 2014       | A dorsal night splint with continuous extension of the big toe for treatment of plantar heel pain                                                                      |
| Meier 2000          | Analgic effect of extracorporeal shockwaves used for tendinosis calcarea, epicondylitis humeri radialis and plantar fasciitis                                          |
| Melegati 2002       | The influence of local steroid injections, bodyweight and the length of symptoms in the treatment of painful subcalcaneal spurs with extracorporeal shock wave therapy |
| Menz 2019           | Coexistence of plantar calcaneal spurs and plantar fascial thickening in individuals with plantar heel pain                                                            |
| Metzner 2010        | High-Energy Extracorporeal Shock-Wave Therapy (ESWT) for the Treatment of Chronic Plantar Fasciitis                                                                    |
| Miszczyk 2003       | [Evaluation of the effectiveness of the calcaneal spurs radiotherapy]                                                                                                  |
| Moyne-Bressand 2018 | Effectiveness of Foot Biomechanical Orthoses to Relieve Patients Suffering from Plantar Fasciitis: Is the Reduction of Pain Related to Change in Neural Strategy?      |
| Nakale 2018         | Association Between Plantar Fasciitis and Isolated Gastrocnemius Tightness                                                                                             |

Onwuanyi 2000 Calcaneal spurs and plantar heel pad pain

Osborne 2006 Critical differences: in lateral X-rays with and without a diagnosis of plantar fasciitis

Park 2014 Long-term outcome of low-energy extracorporeal shock wave therapy for plantar fasciitis: comparative analysis according to ultrasonographic findings

Perlick 1998 High-energy extracorporeal shock wave therapy in plantar calcaneal spur

Placzek 2005 [Botulinum toxin A--therapy option in cases of chronic plantar fasciitis?--an open treatment attempt with 9 patients and a one year observation period]

Placzek 2006 Treatment of chronic plantar fasciitis with Botulinum toxin A - An open pilot study on 25 patients with a 14-week-follow-up

Prasetyo 2017 Additional diagnostic value of digital radiology in plantar fasciitis diagnosis

Putz 2017 Investigation of the acute plantar fasciitis with contrast-enhanced ultrasound and shear wave elastography - first results

Rano 2001 Correlation of heel pain with body mass index and other characteristics of heel pain

Reeboonlap 2012 Outcome of plantar fasciitis treatment using monochrome infrared irradiation

Riddle 2003 Risk factors for plantar fasciitis: A matched case-control study

Riel 2019 Translation and cultural adaptation of a Danish version of the Foot Health Status Questionnaire for individuals with plantar heel pain

Ring 2014 Clinical efficacy and cost-effectiveness of bespoke and prefabricated foot orthoses for plantar heel pain: a prospective cohort study

Rome 2001 Generalised joint hypermobility: a poor predictor of plantar fasciitis in athletes

Rose 2003 Neurosensory testing of the medial calcaneal and medial plantar nerves in patients with plantar heel pain

Sabir 2005 Clinical utility of sonography in diagnosing plantar fasciitis

Scheuer 2016 Approaches to optimize focused extracorporeal shockwave therapy (ESWT) based on an observational study of 363 feet with recalcitrant plantar fasciitis

Sean 2010 Radiofrequency microtenotomy for the treatment of plantar fasciitis shows good early results

Serviat-Hung 2015 [Extracorporeal shockwave therapy in sports and non-sports population. Preliminary results]

Sistermann 1998 Complications, side effects and contraindications using middle and high energetic extracorporeal shock waves in orthopaedics

Sorensen 2011 Percutaneous Bipolar Radiofrequency Microdebridement for Recalcitrant Proximal Plantar Fasciosis

Stropek 2008 Arthroscopic Treatment for Calcaneal Spur Syndrome

Sutera 2010 Plantar fascia evaluation with a dedicated magnetic resonance scanner in weight-bearing position: our experience in patients with plantar fasciitis and in healthy volunteers

Tay 2012 Open technique is more effective than percutaneous technique for TOPAZ radiofrequency coblation for plantar fasciitis

Turgut 1999 The relationship of heel pad elasticity and plantar heel pain  
Comparison of ultrasonography and radiography in assessment of the heel pad compressibility index of patients with plantar heel pain syndrome. Measurement of the fat pad in plantar heel pain syndrome

Uzel 2006

Valizadeh 2018 Relationship Between Anthropometric Findings and Results of Corticosteroid Injections Treatment in Chronic Plantar Heel Pain

VanTonder 2018 Multidimensional impact of low-Dye taping on low-load hopping in individuals with and without plantar fasciitis

Vetrano 2014 Cross-cultural adaptation and reliability of the Italian version of the Foot Function Index (FFI-I) for patients with plantar fasciitis

Walther 2004 Power doppler findings in plantar fasciitis

|                   |                                                                                                                                                                                                                                      |
|-------------------|--------------------------------------------------------------------------------------------------------------------------------------------------------------------------------------------------------------------------------------|
| Wearing 2004      | Sagittal movement of the medial longitudinal arch is unchanged in plantar fasciitis                                                                                                                                                  |
| Weil Jr 2008      | A new minimally invasive technique for treating plantar fasciosis using bipolar radiofrequency: a prospective analysis                                                                                                               |
| Wheeler 2013      | Autologous blood injections for chronic plantar fasciitis - a pilot case-series study shows promising results                                                                                                                        |
| Wheeler 2018      | Extracorporeal Shockwave Therapy Plus Rehabilitation for Patients With Chronic Plantar Fasciitis Might Reduce Pain and Improve Function but Still Not Lead to Increased Activity: A Case-Series Study With Multiple Outcome Measures |
| Wu 2008           | Reliability and validity of the Taiwan Chinese version of the foot function index                                                                                                                                                    |
| Wu 2011           | Sonoelastography of the Plantar Fascia                                                                                                                                                                                               |
| Wu 2013           | [Case-control study of stretching exercise on treatment of plantar fasciitis]                                                                                                                                                        |
| Wu 2015           | Plantar fascia softening in plantar fasciitis with normal B-mode sonography                                                                                                                                                          |
| Yadav 2012        | Comparison of the effects of therapeutic ultrasound v/s myofascial release technique in treatment of plantar fasciitis                                                                                                               |
| Yildiz 2018       | Changes in Rearfoot Alignment in Chronic Plantar Heel Pain                                                                                                                                                                           |
| Yoosefinejad 2015 | Effects of Extracorporeal Shock Wave Therapy on Numerical Rating Scale of Pain in Patients with Chronic Plantar Fasciitis                                                                                                            |
